# Supplementary material for: Alteration in Inflammatory Responses and Cytochrome P450 Expression of Porcine Jejunal Cells by Drinking Water Supplements
Source: Hindawi journal article supplement (doi:10.1155/2019/5420381), 2019-01-02
Supplement: f1 [file 5420381.f1.pdf]

Table S1. Sequence of primer sets used for quantitative real-time PCR analysis

| Gene symbol   | Accession number | Primer sequences (5'-3')                                       | Product size (bp) | Efficiency | Reference |
|---------------|------------------|----------------------------------------------------------------|-------------------|------------|-----------|
| IL-8          | NM_213867        | F: AGAGGTCTGCCTGGACCCCA<br>R: GGGAGCCACGGAGAATGGGT             | 126               | 1.972      | [30]      |
| IL-6          | NM_214399        | F: TTCACCTCTCCGGACAAAAC<br>R: TCTGCCAGTACCTCCTTGCT             | 122               | 1.970      | [31]      |
| TNF- $\alpha$ | NM_214022        | F: TTCCAGCTGGCCCCTTGAGC<br>R: GAGGGCATTGGCATAACCCAC            | 146               | 1.873      | [32]      |
| CYP1A1        | NM_214412.1      | F: CAGAGCTGCTTAGCCTTATCAACC<br>R: CTGGATGCTGGGATTTGTCACCAG     | 386               | 2.00       | [33]      |
| CYP1A2        | NM_001159614.1   | F: GTGAGGAGATGTTTCAGCATCGTGAAG<br>R: CTTCTGTATCTCAGGATATGTCACA | 386               | 1.750      | [34]      |
| CYP3A29       | NM_214423.1      | F: TTCGTGCTTACAGAGAGACCC<br>R: TACTAGGTGGGGGTGGATGG            | 576               | 1.975      | [35]      |
| HSP70         | NM_001123127     | F: GCCCTGAATCCGCAGAATA<br>R: TCCCCACGGTAGGAAACG                | 152               | 2.0        | [36]      |
| CycA          | NM_214353        | F: GCGTCTCCTTCGAGCTGTT<br>R: CCATTATGGCGTGTGAAGTC              | 160               | 1.907      | [32]      |
| HPRT          | NM_001032376     | F: GGAATTGAATCATGTTTGTG<br>R: CAGATGTTTCCAAACTCAAC             | 91                | 1.963      | [37]      |

F: Forward, R: Reverse, IL: Interleukin, TNF- $\alpha$ : Tumour necrosis factor alpha, CYP: Cytochrome P450, HSP70: Heat shock protein 70, HPRT: Hypoxanthine phosphoribosyl transferase, CycA: Cyclophilin-A

Table S2. Transepithelial electrical resistance (TEER) values between apical and basolateral compartment of IPEC-J2 cell cultures. Average and standard deviation (SD) of TEER ( $\text{Ohm}\times\text{cm}^2$ ) data are shown before the treatments and after one-hour incubation time with the test substances.

|                                                                             | Average of TEER<br>( $\text{Ohm}\times\text{cm}^2$ ) prior to<br>treatment | SD of TEER<br>( $\text{Ohm}\times\text{cm}^2$ ) prior to<br>treatment | Average of TEER<br>( $\text{Ohm}\times\text{cm}^2$ ) after<br>treatment | SD of TEER<br>( $\text{Ohm}\times\text{cm}^2$ ) prior to<br>treatment |
|-----------------------------------------------------------------------------|----------------------------------------------------------------------------|-----------------------------------------------------------------------|-------------------------------------------------------------------------|-----------------------------------------------------------------------|
| Control                                                                     | 6712                                                                       | 211                                                                   | 6664                                                                    | 1011                                                                  |
| 10 $\mu\text{g}/\text{ml}$ LPS                                              | 6547                                                                       | 60                                                                    | 6586                                                                    | 386                                                                   |
| 5 $\mu\text{g}/\text{ml}$ $\beta$ -glucan                                   | 6910                                                                       | 62                                                                    | 6870                                                                    | 1128                                                                  |
| 50 $\mu\text{g}/\text{ml}$ $\beta$ -glucan                                  | 6910                                                                       | 216                                                                   | 7352                                                                    | 238                                                                   |
| 5 $\mu\text{g}/\text{ml}$ SN                                                | 6280                                                                       | 59                                                                    | 7400                                                                    | 645                                                                   |
| 50 $\mu\text{g}/\text{ml}$ SN                                               | 6367                                                                       | 209                                                                   | 6784                                                                    | 141                                                                   |
| 25 $\mu\text{g}/\text{ml}$ Fulvic acid                                      | 6580                                                                       | 262                                                                   | 7355                                                                    | 321                                                                   |
| 250 $\mu\text{g}/\text{ml}$ Fulvic acid                                     | 6800                                                                       | 481                                                                   | 7041                                                                    | 203                                                                   |
| 0.1 $\mu\text{l}/\text{ml}$ DWA                                             | 7639                                                                       | 16                                                                    | 7382                                                                    | 598                                                                   |
| 1 $\mu\text{l}/\text{ml}$ DWA                                               | 7769                                                                       | 255                                                                   | 7718                                                                    | 403                                                                   |
| 5 $\mu\text{g}/\text{ml}$ $\beta$ -glucan + 10 $\mu\text{g}/\text{ml}$ LPS  | 7103                                                                       | 182                                                                   | 4592                                                                    | 441                                                                   |
| 50 $\mu\text{g}/\text{ml}$ $\beta$ -glucan + 10 $\mu\text{g}/\text{ml}$ LPS | 7302                                                                       | 185                                                                   | 5132                                                                    | 728                                                                   |
| 5 $\mu\text{g}/\text{ml}$ SN + 10 $\mu\text{g}/\text{ml}$ LPS               | 6849                                                                       | 183                                                                   | 5075                                                                    | 606                                                                   |
| 50 $\mu\text{g}/\text{ml}$ SN + 10 $\mu\text{g}/\text{ml}$ LPS              | 7031                                                                       | 76                                                                    | 5283                                                                    | 730                                                                   |
| 25 $\mu\text{g}/\text{ml}$ Fulvic acid + 10 $\mu\text{g}/\text{ml}$ LPS     | 6824                                                                       | 105                                                                   | 6127                                                                    | 1090                                                                  |
| 250 $\mu\text{g}/\text{ml}$ Fulvic acid + 10 $\mu\text{g}/\text{ml}$ LPS    | 6972                                                                       | 386                                                                   | 8418                                                                    | 12                                                                    |
| 0.1 $\mu\text{l}/\text{ml}$ DWA + 10 $\mu\text{g}/\text{ml}$ LPS            | 7709                                                                       | 300                                                                   | 5940                                                                    | 521                                                                   |
| 1 $\mu\text{l}/\text{ml}$ DWA + 10 $\mu\text{g}/\text{ml}$ LPS              | 7838                                                                       | 236                                                                   | 6083                                                                    | 874                                                                   |

LPS: Lipopolysaccharide, SN: Sanguinarine containing product, DWA: Drinking water acidifier

The integrity of the monolayer IPEC-J2 cell cultures was not damaged due to the 1 hour treatment with the test substances.
